# Supplementary material for: A sulfur-containing fluorescent hybrid porous polymer for selective detection and adsorption of Hg2+ ions
Source: Royal Society of Chemistry journal article supplement (doi:10.1039/d2py00077f), 2022-01-01
Supplement: d2py00077f1.pdf [file d2py00077f1.pdf]

## Supporting Information

### **A sulfur-containing fluorescent hybrid porous polymer for selective detection and adsorption of Hg<sup>2+</sup> ions**

*Zhuo Lv, Zixu Chen, Shengyu Feng, Dengxu Wang, \* Hongzhi Liu*

National Engineering Research Center for Colloidal Materials & Key Laboratory of Special Functional Aggregated Materials, Ministry of Education, Shandong Key Laboratory of Advanced Organosilicon Materials and Technologies, School of Chemistry and Chemical Engineering, Shandong University, Jinan 250100, P. R. China

\*Corresponding author's e-mail: dxwang@sdu.edu.cn

#### **Table of contents**

#### **Characterization**

**Fig. S1** The photographs of HPP-1 and HPP-SH in the solid state, and their suspensions in ethanol (0.1 mg mL<sup>-1</sup>) with and without UV light.

**Fig. S2** Contact angle measurements of water droplets on the surface of HPP-1 (a) and HPP-SH (b)

**Fig. S3** <sup>29</sup>Si NMR spectra of HPP-1 and HPP-SH in the solid state.

**Fig. S4** XRD spectra of HPP-1 and HPP-SH.

**Fig. S5** SEM images and TEM images of HPP-1 and HPP-SH.

**Fig. S6** TGA curves of HPP-1 and HPP-SH under N<sub>2</sub> atmosphere with a heating rate of 10°C min<sup>-1</sup>.

**Fig. S7** (a) Nitrogen adsorption and desorption isotherms and (b) pore size distribution of HPP-SH-2.5 and HPP-SH-5 calculation based upon NLDFT.

**Fig. S8** The pore size distribution of HPP-1 and HPP-SH (a) and HPP-SH-2.5 and HPP-SH-5 (b) calculation based upon the BJH method.

**Fig. S9** The fluorescence quenching photographs of HPP-SH suspensions (0.1 mg/mL) after adding  $\text{Hg}^{2+}$  ions (100 ppm) under UV light.

**Fig. S10** The fluorescence emission spectra of the suspensions (0.1 mg/mL) of HPP-SH-2.5; HPP-SH-5 and HPP-SH ( $\lambda_{\text{ex}} = 365 \text{ nm}$ ).

**Fig. S11** The LOD was obtained by the linear relationship between emission intensity of HPP-SH-2.5 suspension and the concentrations of  $\text{Hg}^{2+}$  from 0 to 10 ppm.

**Fig. S12** The LOD was obtained by the linear relationship between emission intensity of HPP-SH-5 suspension and the concentrations of  $\text{Hg}^{2+}$  from 0 to 10 ppm.

**Fig. S13** Equilibrium adsorption isotherm evaluated by the Freundlich model.

**Fig. S14** Adsorption kinetics estimated by the pseudo-first-order model.

**Fig. S15** High-resolution spectra of Hg4f after adsorption of  $\text{Hg}^{2+}$  by HPP-SH.

**Fig. S16** BET plots of HPP-1 ( $r = 0.999952$ ,  $C = 211.901$ ).

**Fig. S17** BET plots of HPP-SH-2.5 ( $r = 0.999918$ ,  $C = 280.638$ )

**Fig. S18** BET plots of HPP-SH-5 ( $r = 0.999969$ ,  $C = 252.011$ )

**Fig. S19** BET plots of HPP-SH ( $r = 0.999904$ ,  $C = 267.780$ ).

**Table S1** The elemental analysis of HPP-SH before and after  $380^\circ$  heating.

**Table S2** Porosity data of HPP-1 and HPP-SH.

**Table S3** Porosity data of HPP-1 and HPP-SH in harsh conditions.

**Table S4** The absolute quantum yields of HPP-1 and HPP-SH with and without other metal ions.

**Table S5** The parameters of LOD for HPP-SH.

**Table S6** The parameters of LOD for HPP-SH-2.5.

**Table S7** The parameters of LOD for HPP-SH-5.

**Table S8** The Langmuir isotherm model parameters for the adsorption of  $\text{Hg}^{2+}$  by HPP-SH.

**Table S9** The Freundlich isotherm model parameters for the adsorption of  $\text{Hg}^{2+}$  by HPP-SH.

**Table S10** Kinetic parameters for the adsorption of  $\text{Hg}^{2+}$  by HPP-SH.

**Characterization.** Fourier transform infrared (FT-IR) spectra were measured within a 4000 to 400  $\text{cm}^{-1}$  region and recorded on a Bruker TENSOR-27 infrared spectrophotometer (KBr pellet). Solid-state  $^{13}\text{C}$  and  $^{29}\text{Si}$  cross-polarization/magic-angle-spinning (CP/MAS) NMR spectra were recorded on a Bruker AVANCE-500 NMR spectrometer operating at a magnetic field strength of 9.4 T. The resonance frequencies at this field strength were 125 and 99 MHz for  $^{13}\text{C}$  and  $^{29}\text{Si}$  NMR, respectively. A chemagnetics 5 mm triple-resonance MAS probe was used to acquire  $^{13}\text{C}$  and  $^{29}\text{Si}$  NMR spectra.  $^{29}\text{Si}$  MAS NMR spectra with high power proton decoupling were recorded by using a p/2 pulse length of 5 ms, a recycle delay of 120 s, and a spinning rate of 5 kHz. Elemental analyses were conducted using an Elementar vario EL III elemental analyzer.

Thermogravimetric analysis (TGA) was performed under  $\text{N}_2$  using a TA SDTQ600 from 30 °to 800 °C with a heating rate of 10 °C  $\text{min}^{-1}$ . Contact angles were recorded by using a Dataphysics OCA-20 contact angle analyzer with distilled water as the test liquid. Powder X-ray diffraction (PXRD) was performed by a Rigaku D/MAX 2550 diffractometer with Cu-K $\alpha$  radiation, 40 kV, 20 mA with the  $2\theta$  range of 10°~80° (scanning rate of 10°  $\text{min}^{-1}$ ). Field-emission scanning electron microscopy (FE-SEM) experiments were carried out by using HITACHI S4800 Spectrometer. The high-resolution transmission electron microscopy (HR-TEM) experiments were performed by using a JEM 2100 electron microscope (JEOL, Japan) with an acceleration voltage of 200 kV. X-ray photoelectron spectroscopy (XPS) was analysed by using the

instrument of Thermo Scientific ESCALAB 250Xi with the Al K $\alpha$  radiation anode. The concentration of Hg<sup>2+</sup> ions was measured by a GBC 923B-model atomic absorption spectrophotometer (AAS) (Melbourne, Australian) or inductively coupled plasma mass spectrometry (ICP-MS) (Shelton, CT, USA). Nitrogen sorption isotherm measurements were carried out on a Micro Meritics surface area and pore size analyzer. Before measurement, samples were degassed at 100 °C for at least 12 h. A sample of around 100 mg and a UHP-grade nitrogen (99.999%) gas source were used in the nitrogen sorption measurements at 77 K and collected with a Quantachrome Quadrasorb apparatus. BET surface areas were determined over a P/P<sub>0</sub> range from 0.01 to 0.20. Nonlocal density functional theory (NL-DFT) and Barrett-Joyner-Halenda (BJH) pore size distributions were determined by using the carbon/slit-cylindrical pore mode of the Quadrawin software. Prior to the measurements, the samples were degassed at 120 °C for at least 12 h. The fluorescent spectra of the samples were recorded with a Hitachi F-7000 fluorescence spectrophotometer using a monochromated Xe lamp as an excitation source. The absolute fluorescence quantum yields were evaluated by Rayleigh scattering using an integrating sphere and estimated using Wrighton-Ginley-Morse's method.

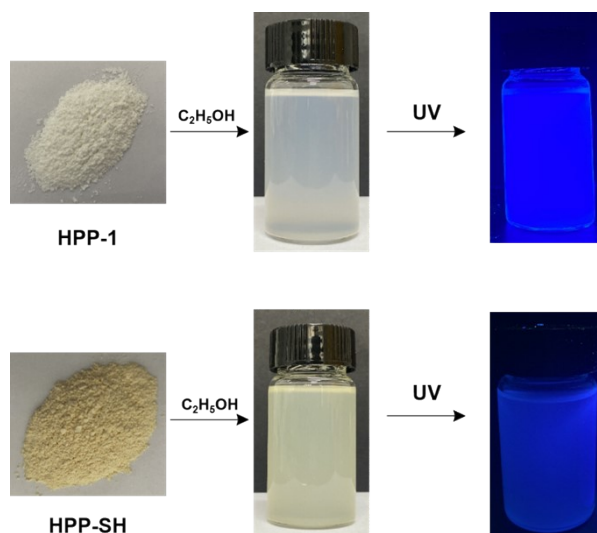

**Fig. S1** The photographs of HPP-1 and HPP-SH in the solid state, and their suspensions in ethanol (0.1 mg mL<sup>-1</sup>) with and without UV light

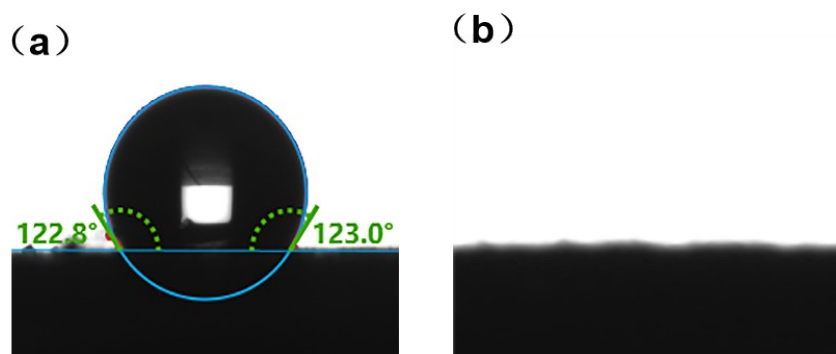

**Fig. S2** Contact angle measurements of water droplets on the surface of HPP-1 (a) and HPP-SH (b)

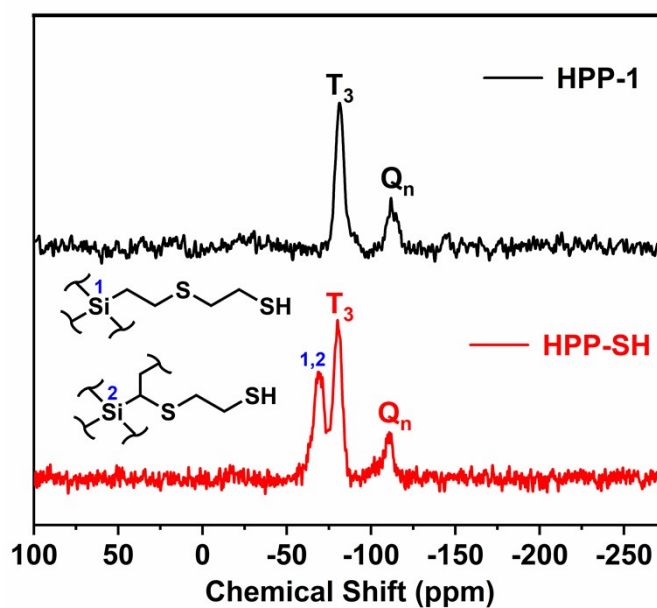

**Fig. S3** <sup>29</sup>Si NMR spectra of HPP-1 and HPP-SH in the solid state.

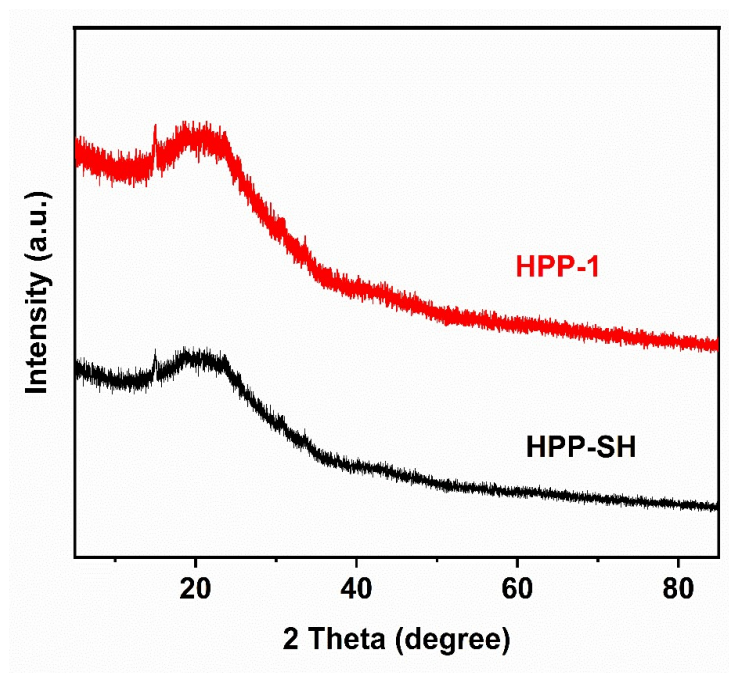

**Fig. S4** XRD spectra of HPP-1 and HPP-SH

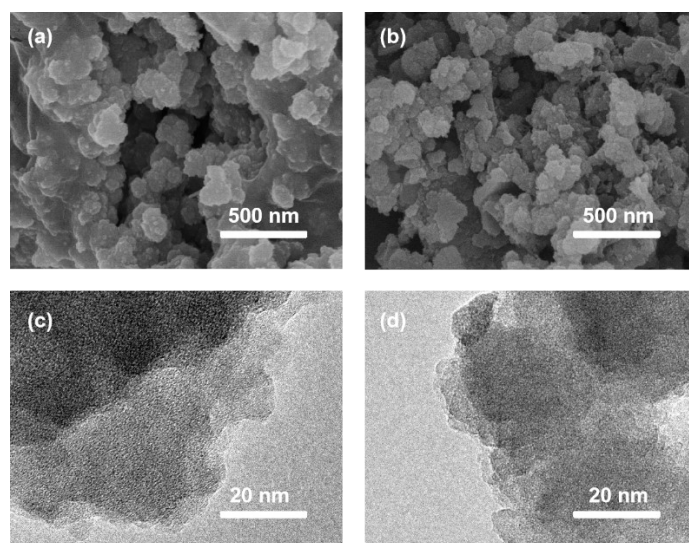

**Fig. S5** SEM images of HPP-1 (a) and HPP-SH (b) and TEM images of HPP-1 (c) and HPP-SH (d)

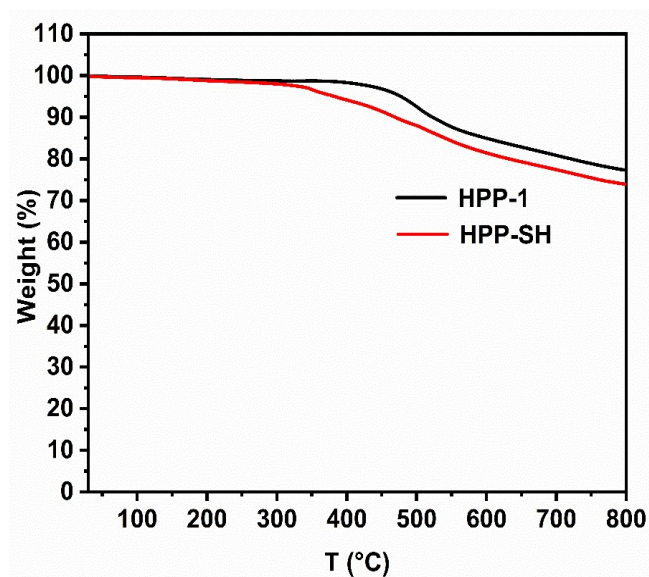

**Fig. S6** TGA curves of HPP-1 and HPP-SH under N<sub>2</sub> atmosphere with a heating rate of 10°C min<sup>-1</sup>

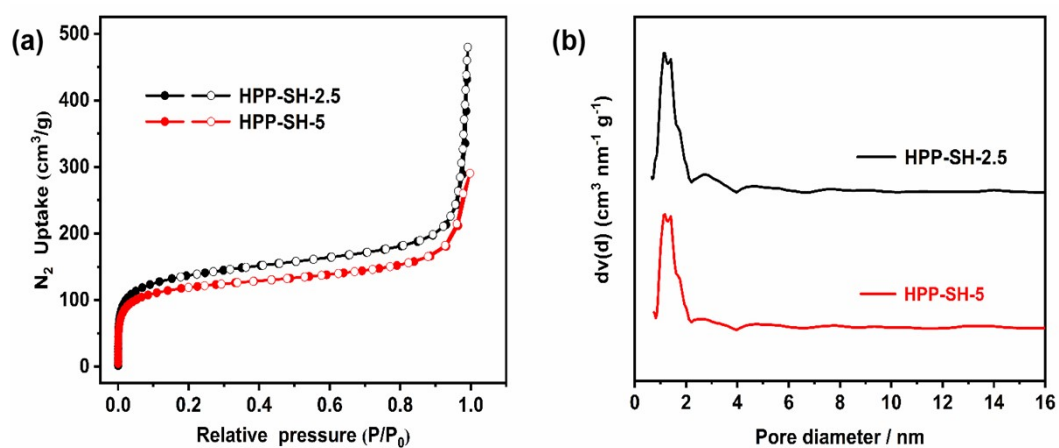

**Fig. S7** (a) Nitrogen adsorption and desorption isotherms and (b) pore size distribution of HPP-SH-2.5 and HPP-SH-5 calculation based upon NLDT

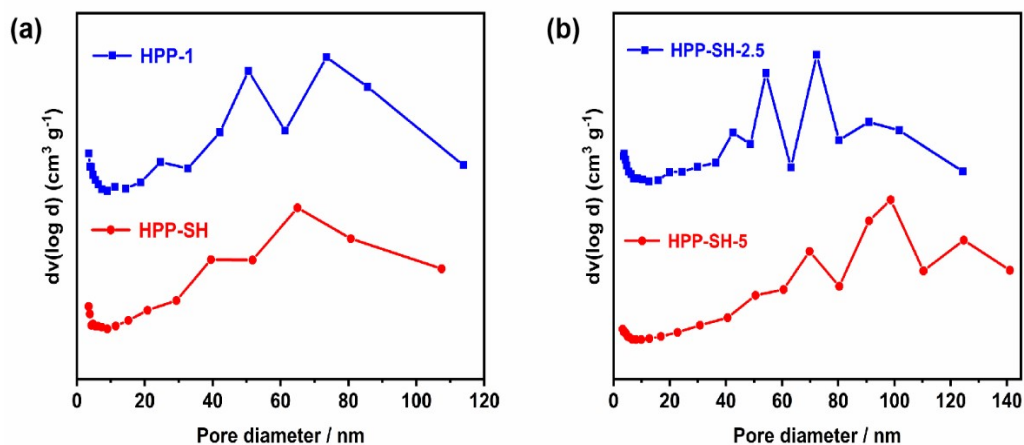

**Fig. S8** The pore size distribution of HPP-1 and HPP-SH (a) and HPP-SH-2.5 and HPP-SH-5 (b) calculation based upon the BJH method

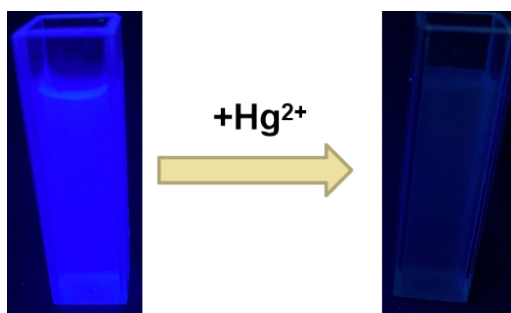

**Fig. S9** The fluorescence quenching photographs of HPP-SH suspensions (0.1 mg/mL) after adding  $\text{Hg}^{2+}$  ions (100 ppm) under UV light

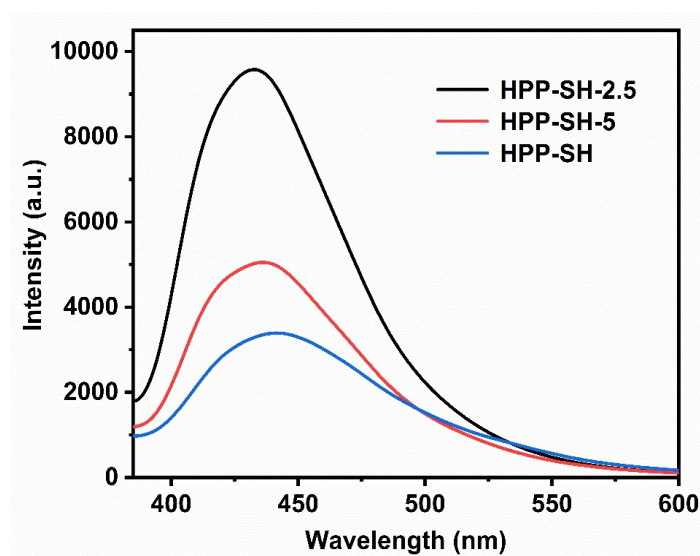

**Fig. S10** The fluorescence emission spectra of the suspensions (0.1 mg/mL) of HPP-SH-2.5; HPP-SH-5 and HPP-SH ( $\lambda_{\text{ex}} = 365 \text{ nm}$ ).



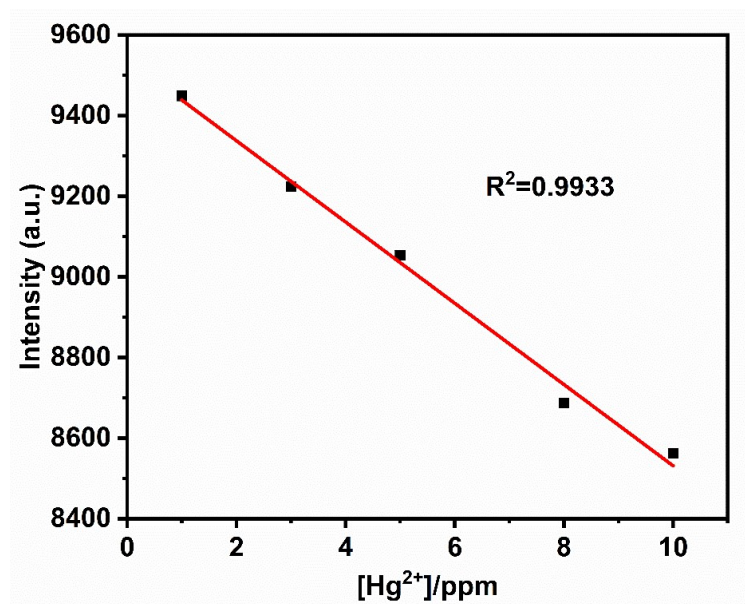

**Fig. S11** The LOD was obtained by the linear relationship between emission intensity of HPP-SH-2.5 suspension and the concentrations of  $Hg^{2+}$  from 0 to 10 ppm.

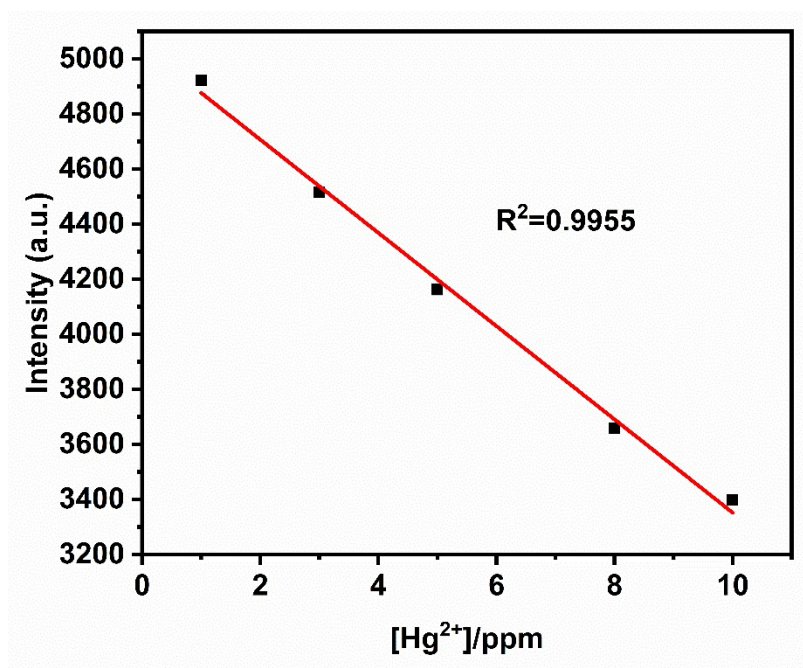

**Fig. S12** The LOD was obtained by the linear relationship between emission intensity of HPP-SH-5 suspension and the concentrations of  $Hg^{2+}$  from 0 to 10 ppm.

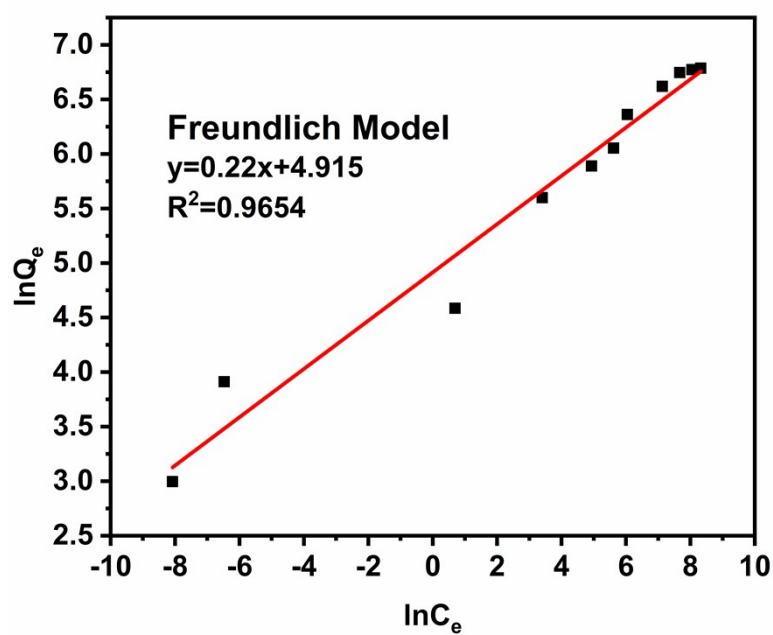

**Fig. S13** Equilibrium adsorption isotherm evaluated by the Freundlich model.

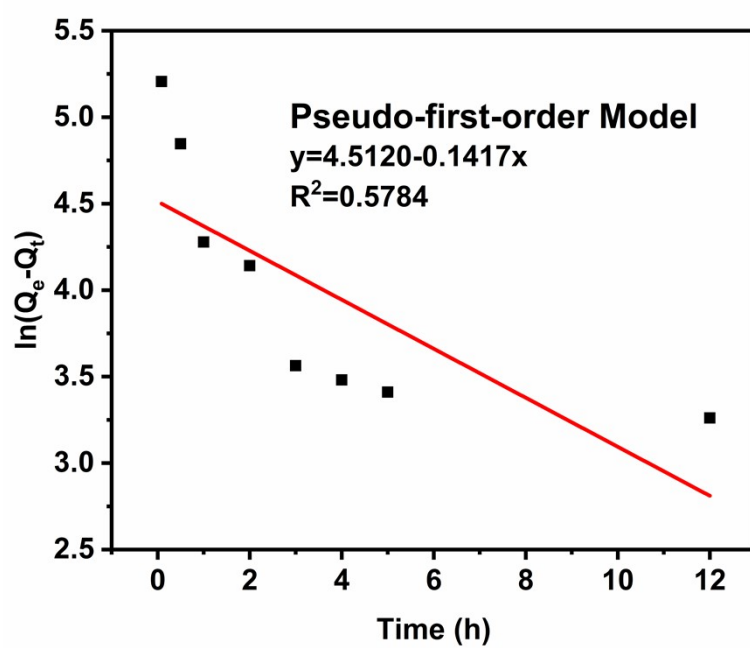

**Fig. S14** Adsorption kinetics estimated by the pseudo-first-order model

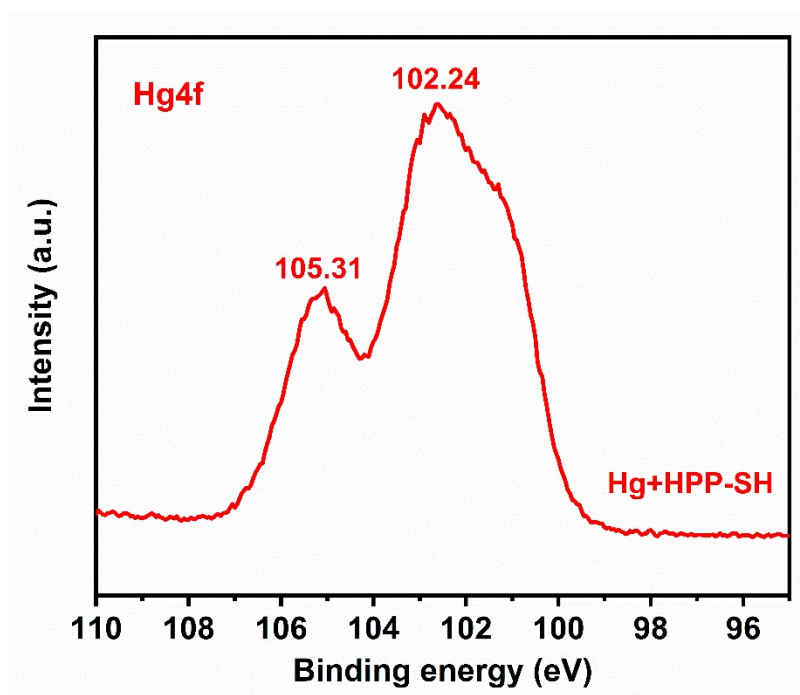

**Fig. S15** High-resolution spectra of Hg4f after adsorption of  $\text{Hg}^{2+}$  by HPP-SH

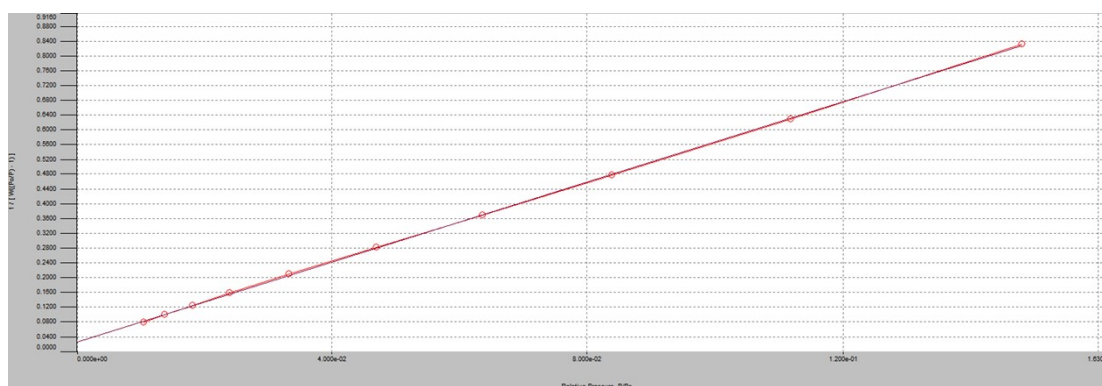

**Fig. S16** BET plots of HPP-1 ( $r = 0.999952$ ,  $C = 211.901$ )

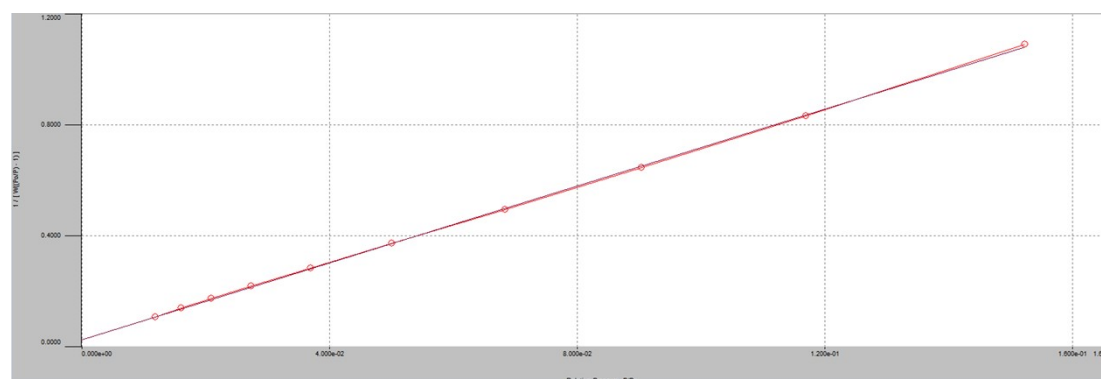

**Fig. S17** BET plots of HPP-SH-2.5 ( $r = 0.999918$ ,  $C = 280.638$ )

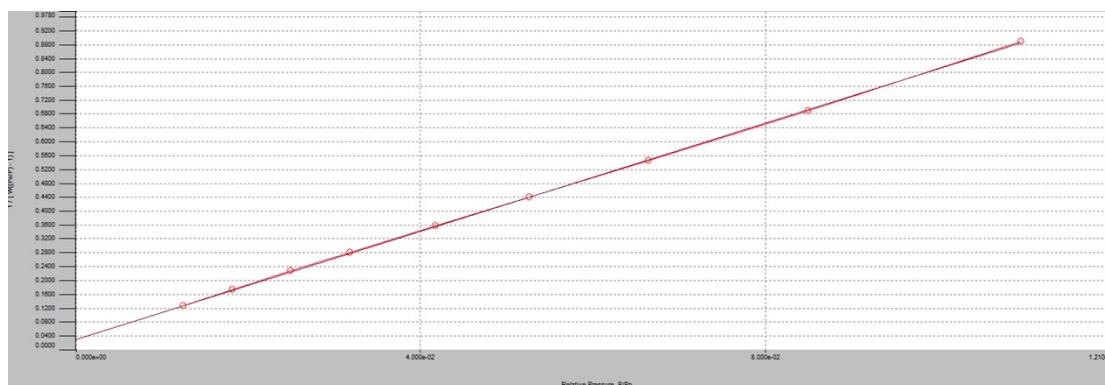

**Fig. S18** BET plots of HPP-SH-5 ( $r = 0.999969$ ,  $C = 252.011$ )

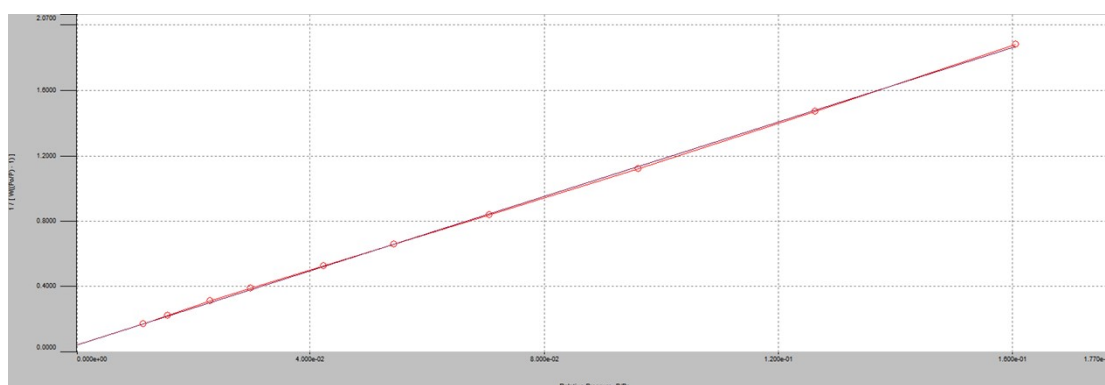

**Fig. S19** BET plots of HPP-SH ( $r = 0.999904$ ,  $C = 267.780$ )

**Table S1** The elemental analysis of HPP-SH before and after 380° heating.

| Polymers                     | C (wt%) | H (wt%) | S (wt%) |
|------------------------------|---------|---------|---------|
| HPP-SH                       | 37.07   | 3.81    | 14.44   |
| HPP-SH after 380°<br>heating | 32.96   | 2.52    | 3.98    |

**Table S2** Porosity data of HPP-1, HPP-SH-2.5, HPP-SH-5 and HPP-SH.

| Polymers   | $S_{\text{BET}}$<br>( $\text{m}^2\text{g}^{-1}$ ) [a] | $S_{\text{micro}}$<br>( $\text{m}^2\text{g}^{-1}$ ) [b] | $V_{\text{total}}$<br>( $\text{cm}^3\text{g}^{-1}$ ) [c] | $V_{\text{micro}}$<br>( $\text{cm}^3\text{g}^{-1}$ ) [d] | $V_{\text{micro}}/V_{\text{total}}$ |
|------------|-------------------------------------------------------|---------------------------------------------------------|----------------------------------------------------------|----------------------------------------------------------|-------------------------------------|
| HPP-1      | 639                                                   | 438                                                     | 0.66                                                     | 0.18                                                     | 0.28                                |
| HPP-SH-2.5 | 501                                                   | 350                                                     | 0.58                                                     | 0.14                                                     | 0.24                                |
| HPP-SH-5   | 435                                                   | 336                                                     | 0.45                                                     | 0.13                                                     | 0.29                                |
| HPP-SH     | 305                                                   | 199                                                     | 0.40                                                     | 0.079                                                    | 0.20                                |

[a] Surface area calculated from  $\text{N}_2$  adsorption isotherm using the BET method; [b] Microporous surface area calculated from  $\text{N}_2$  adsorption isotherm using t-plot method; [c] Total pore volume calculated at  $P/P_0 = 0.99$ ; [d] Micropore volume derived using the t-plot method based on the de-Boer thickness equation.

**Table S3** Porosity data of HPP-1 and HPP-SH in harsh conditions.

| Polymers | pH | $S_{\text{BET}}$<br>( $\text{m}^2\text{g}^{-1}$ ) <sup>[a]</sup> | $S_{\text{micro}}$<br>( $\text{m}^2\text{g}^{-1}$ ) <sup>[b]</sup> | $V_{\text{total}}$<br>( $\text{cm}^3\text{g}^{-1}$ ) <sup>[c]</sup> | $V_{\text{micro}}$<br>( $\text{cm}^3\text{g}^{-1}$ ) <sup>[d]</sup> | $V_{\text{micro}}/V_{\text{total}}$ |
|----------|----|------------------------------------------------------------------|--------------------------------------------------------------------|---------------------------------------------------------------------|---------------------------------------------------------------------|-------------------------------------|
| HPP-1    | 1  | 628                                                              | 425                                                                | 0.72                                                                | 0.17                                                                | 0.24                                |
|          | 6  | 621                                                              | 436                                                                | 0.69                                                                | 0.18                                                                | 0.26                                |
|          | 8  | 637                                                              | 410                                                                | 0.70                                                                | 0.16                                                                | 0.23                                |
|          | 13 | 633                                                              | 443                                                                | 0.71                                                                | 0.19                                                                | 0.27                                |
| HPP-SH   | 1  | 306                                                              | 194                                                                | 0.43                                                                | 0.077                                                               | 0.18                                |
|          | 6  | 310                                                              | 203                                                                | 0.40                                                                | 0.082                                                               | 0.21                                |
|          | 8  | 295                                                              | 191                                                                | 0.38                                                                | 0.079                                                               | 0.21                                |
|          | 13 | 320                                                              | 210                                                                | 0.42                                                                | 0.081                                                               | 0.19                                |

[a] Surface area calculated from  $\text{N}_2$  adsorption isotherm using the BET method; [b] Microporous surface area calculated from  $\text{N}_2$  adsorption isotherm using t-plot method; [c] Total pore volume calculated at  $P/P_0 = 0.99$ ; [d] Micropore volume derived using the t-plot method based on the de-Boer thickness equation.

**Table S4** The absolute quantum yields of HPP-1 and HPP-SH with and without other metal ions.

|                          | quantum yield(%) |
|--------------------------|------------------|
| HPP-1                    | 15.59            |
| HPP-1+ $\text{Hg}^{2+}$  | 15.37            |
| HPP-SH                   | 4.41             |
| HPP-SH+ $\text{Hg}^{2+}$ | 2.10             |
| HPP-SH+ $\text{Ba}^{2+}$ | 4.32             |
| HPP-SH+ $\text{Cu}^{2+}$ | 4.18             |

**Table S5** The parameters of LOD for HPP-SH.

|        | Parameters |          |
|--------|------------|----------|
| HPP-SH | LOD (ppb)  | 4.48     |
|        | $\sigma$   | 1.55     |
|        | K          | 1038.122 |

**Table S6** The parameters of LOD for HPP-SH-2.5.

|            | Parameters |         |
|------------|------------|---------|
| HPP-SH-2.5 | LOD (ppb)  | 50.88   |
|            | $\sigma$   | 1.71    |
|            | K          | 100.816 |

**Table S7** The parameters of LOD for HPP-SH-5.

| Parameters |           |         |
|------------|-----------|---------|
| HPP-SH-5   | LOD (ppb) | 27.10   |
|            | $\sigma$  | 1.53    |
|            | K         | 169.383 |

**Table S8** The Langmuir isotherm model parameters for the adsorption of  $\text{Hg}^{2+}$  by HPP-SH

| Model          | Parameters   |        |
|----------------|--------------|--------|
| Langmuir model | $Q_m$ (mg/g) | 900.9  |
|                | $K_L$ (L/mg) | 44.05  |
|                | $R^2$        | 0.9964 |

**Table S9** The Freundlich isotherm model parameters for the adsorption of  $\text{Hg}^{2+}$  by HPP-SH

| Model            | Parameters   |        |
|------------------|--------------|--------|
| Freundlich model | $K_F$ (L/mg) | 136.32 |
|                  | $1/n$        | 0.22   |
|                  | $R^2$        | 0.9654 |

**Table S10** Kinetic parameters for the  $\text{Hg}^{2+}$  by HPP-SH

| Model               | Parameters                                |        |
|---------------------|-------------------------------------------|--------|
| Pseudo-second order | $Q_e$ (mg/g)                              | 370    |
|                     | $K_2$ ( $\text{h}^{-1}$ )                 | 0.0065 |
|                     | $R^2$                                     | 0.9988 |
| Pseudo-first order  | $Q_e$ (mg/g)                              | 91.1   |
|                     | $K_1$ ( $\text{g g}^{-1} \text{h}^{-1}$ ) | 0.1417 |
|                     | $R^2$                                     | 0.5784 |
